# Supplementary material for: Identification of a cytogenetic and molecular subgroup of acute myeloid leukemias showing sensitivity to L-Asparaginase
Source: PubMed Central journal article supplement (PMC5746353; doi:10.18632/oncotarget.18565), 2017-06-19
Supplement: oncotarget-08-109915-s001.pdf [file oncotarget-08-109915-s001.pdf]

# Identification of cytogenetic and molecular subgroup of acute myeloid leukemias showing sensitivity to L-Asparaginase

## SUPPLEMENTARY MATERIALS

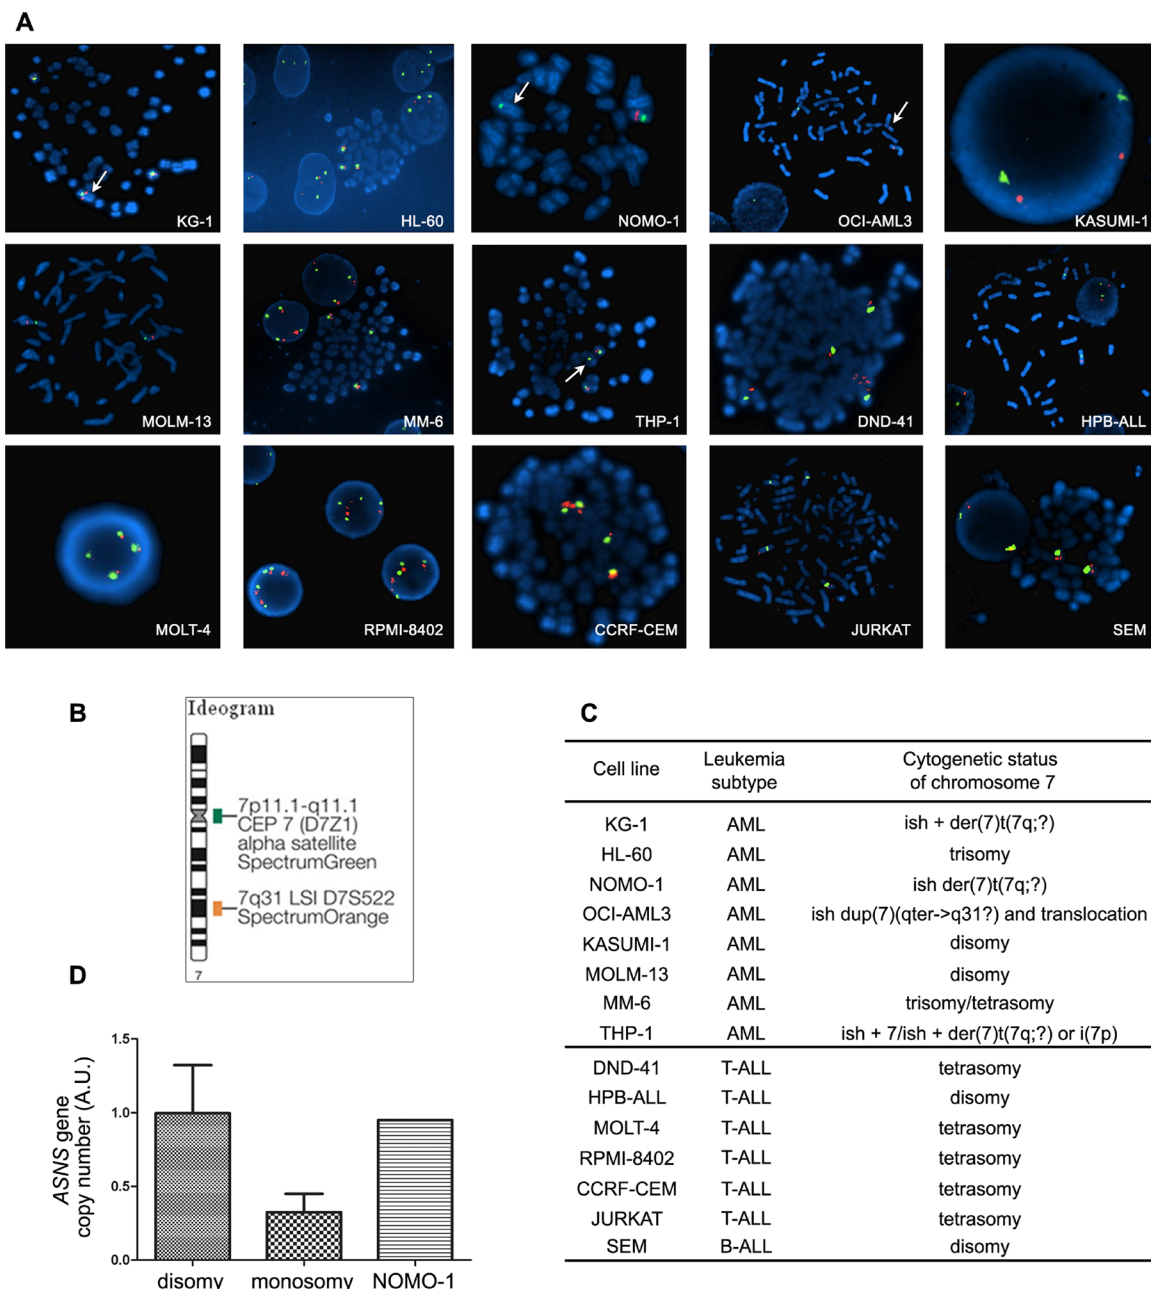

**Supplementary Figure 1: FISH analysis of AML and ALL cell lines without -7, using LSI D7S522/CEP 7 probe, a mixture of Spectrum Orange (7q31) and Spectrum Green (7p11.1-q11.1) probes.** Normal diploid chromosome 7 have two signals for both centromeric (green) and telomeric (orange) probes. (A) Interphase or metaphase FISH results of 8 AML (KG-1, HL-60, NOMO-1, OCI-AML3, KASUMI-1, MOLM-13, MM-6, THP-1) and 7 ALL (DND-41, HPB-ALL, MOLT-4, RPMI-8402, CCRF-CEM, JURKAT, SEM) cell lines. Arrows indicates complex aberrations involving chromosome 7. (B) Ideogram of LSI D7S522/CEP 7 probe. (C) Summary of cytogenetic status of chromosome 7 in both AML and ALL cell lines. (D) Copy number analysis by qPCR of ASNS locus in NOMO-1 cells, compared with disomic (SEM, KASUMI-1, MOLM-13) and monosomic (UCSD-AML1, FKH-1) cell lines.

## TARGET AML data

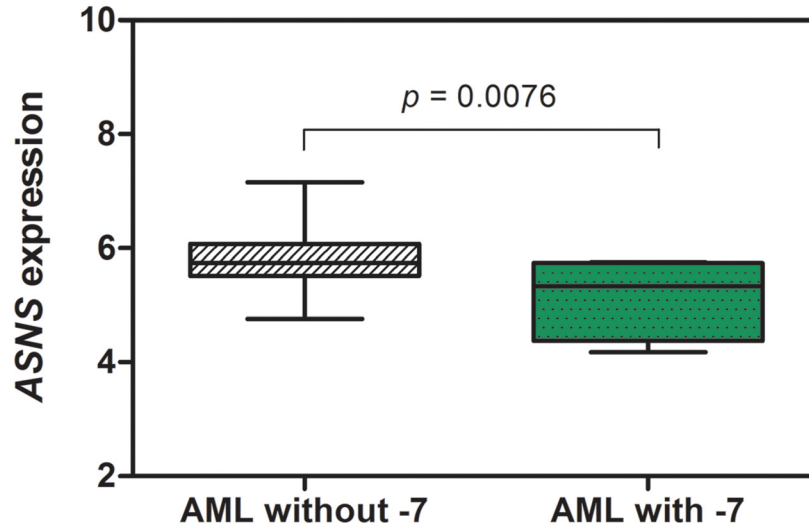

**Supplementary Figure 2: ASNS expression in pediatric TARGET AML database.** Boxplots show ASNS normalized expression of samples from the NCI-COG TARGET AML project (<https://ocg.cancer.gov/programs/target/acute-myeloid-leukemia>), classified by chromosome 7 status.

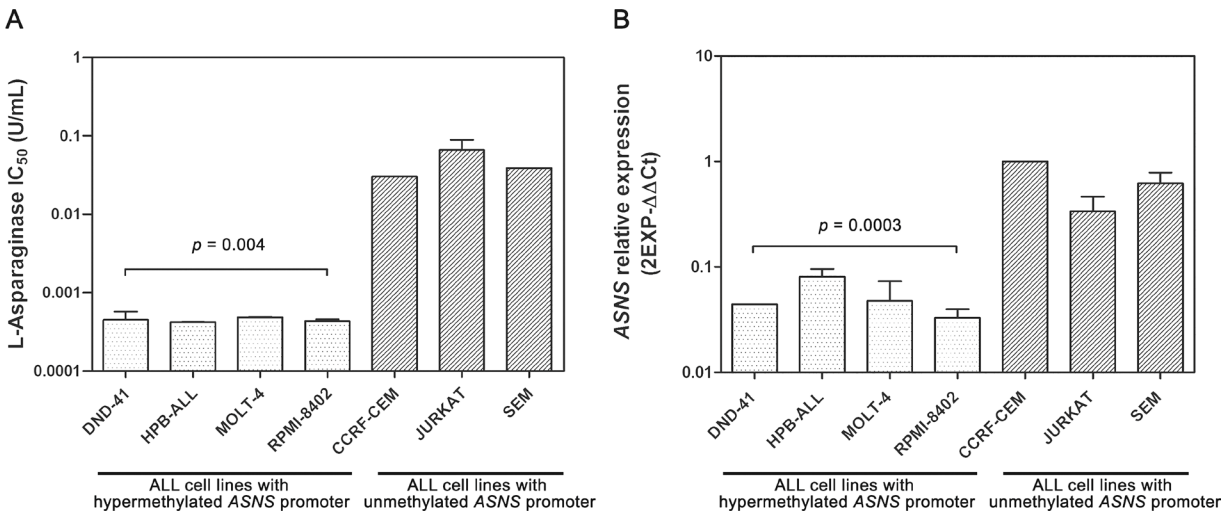

**Supplementary Figure 3: (A)**  $IC_{50}$  of ALL cell lines after 48 h of treatment with increasing concentrations of L-Asp. DND41, HPB-ALL, MOLT-4 and RPMI-8402, which have *ASNS* promoter methylation, were more sensitive than other ALL cell lines (Unpaired *t* test,  $p = 0.004$ ). **(B)** ALL cell lines sensitive to L-Asp treatment showed lower amount of *ASNS* transcript (Unpaired *t* test,  $p = 0.0004$ ). *ASNS* relative expression is calculated as  $2^{-\Delta\Delta Ct}$ . Gene expression was normalized to *GAPDH* and *ATP5B* housekeeping genes. Data are expressed as mean  $\pm$  SD of three independent experiments.
